# Supplementary material for: Colloid probe AFM study of thermal collapse and protein interactions of poly(N-isopropylacrylamide) coatings
Source: Royal Society of Chemistry journal article supplement (doi:10.1039/b926441h), 2010-01-01
Supplement: b926441h.pdf [file b926441h.pdf]

## Colloid probe AFM study of thermal collapse and protein interactions of poly(*N*-isopropylacrylamide) coatings

Martin A. Cole,<sup>\*a</sup> Nicolas H. Voelcker,<sup>a,b</sup> Helmut Thissen,<sup>c</sup> Roger Horn<sup>a</sup> and Hans J. Griesser<sup>a</sup>

XPS surface characterization is presented for the alternative immobilization procedure employed for gold substrates and QCM crystals.

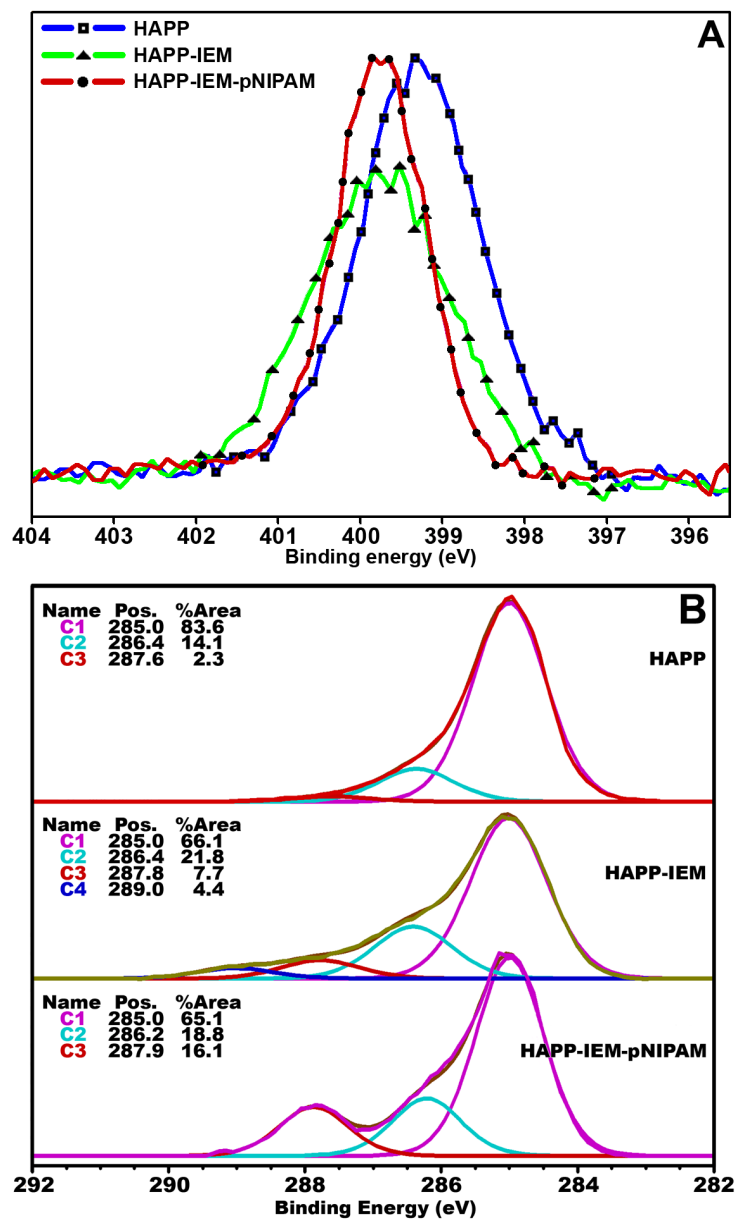

**Figure S1.** XPS high resolution N1s (A) and C1s (B) spectra recorded on QCM sensors during coating preparation: heptylamine plasma polymer (HAPP); HAPP with IEM coupled (HAPP-IEM); and pNIPAM grafted onto IEM (HAPP-IEM-pNIPAM).
